# Supplementary material for: Fast genetic mapping of complex traits in C. elegans using millions of individuals in bulk
Source: PubMed Central journal article supplement (PMC6582151; doi:10.1038/s41467-019-10636-9), 2019-06-18
Supplement: 41467_2019_10636_MOESM3_ESM.pdf [file 41467_2019_10636_MOESM3_ESM.pdf]

## Description of Additional Supplementary Files

File Name: **Supplementary Data 1**

Description: Details of RNAi screen to identify the transcriptional regulator of *hsp-90*.

File Name: **Supplementary Data 2**

Description: *C. elegans* strains used in this study

File Name: **Supplementary Data 3.**

Description: Illumina short-read sequencing runs
